# Supplementary material for: A plume-in-grid approach to characterize air quality impacts of aircraft emissions at the Hartsfield–Jackson Atlanta International Airport
Source: Copernicus journal article supplement (doi:10.5194/acp-13-9285-2013), 2013-09-16
Supplement: Supplementary file 1 [file acp-13-9285-2013-supplement.zip]

## **Supplementary Material for:**

# **A Plume-in-Grid Approach to Characterize Air Quality Impacts of Aircraft Emissions at the Hartsfield-Jackson Atlanta International Airport**

**J. Rissman<sup>1</sup>, S. Arunachalam<sup>2</sup>, M. Woody<sup>3</sup>, J. J. West<sup>3</sup>, T. BenDor<sup>4</sup>, F. S. Binkowski<sup>2</sup>**

[1]{Energy Innovation: Policy and Technology LLC, 98 Battery St. Ste. 202, San Francisco, CA 94111, USA}

[2]{Institute for the Environment, University of North Carolina at Chapel Hill, Chapel Hill, NC 27599, USA}

[3]{Department of Environmental Science and Engineering, University of North Carolina at Chapel Hill, Chapel Hill, NC 27599, USA}

[4]{Department of City and Regional Planning, University of North Carolina at Chapel Hill, Chapel Hill, NC 27599, USA}

Correspondence to: S. Arunachalam (sarav@email.unc.edu)

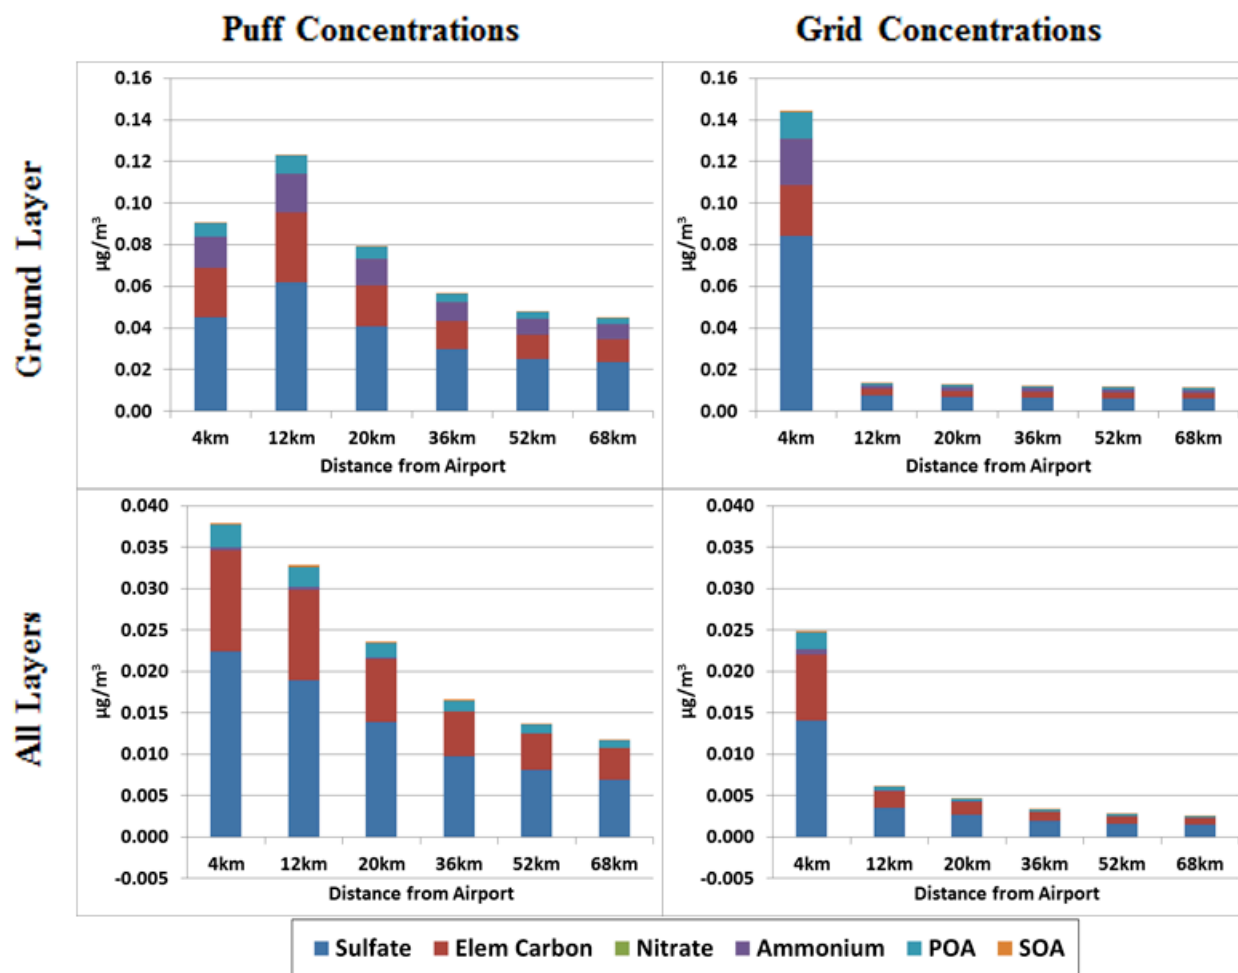

Figure S1: Median concentration of PM<sub>2.5</sub> component species in puffs and in aircraft contribution to grid cells at various distances in modeled surface layer, and in all layers. The analysis includes all grid cells in each concentric ring as we go outward from the airport, so puffs or grid cells in each bar are also used to calculate the results at all greater distances from the airport. Note that the vertical axis scale varies by graph.

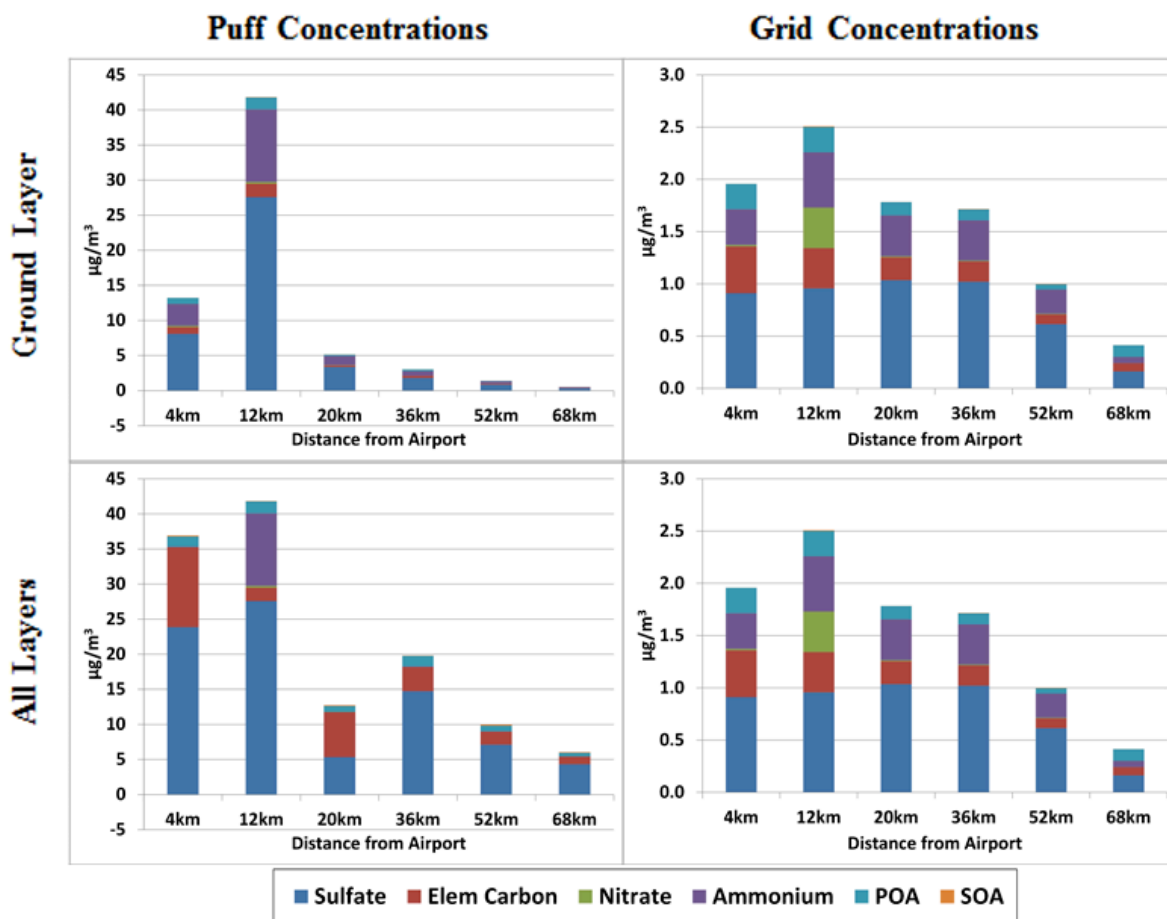

Figure S2: Maximum concentration of PM<sub>2.5</sub> component species in puffs and in aircraft contribution to grid cells at various distances in modeled surface layer, and in all layers. The analysis includes only those grid cells in the outer-most ring as we go outward from the airport, and thus no overlap of grid cells in each bar. Outliers are not excluded, so these bars represent the highest puff and grid concentrations in each ring observed in the entire model run. Note that the vertical axis scale varies by graph.

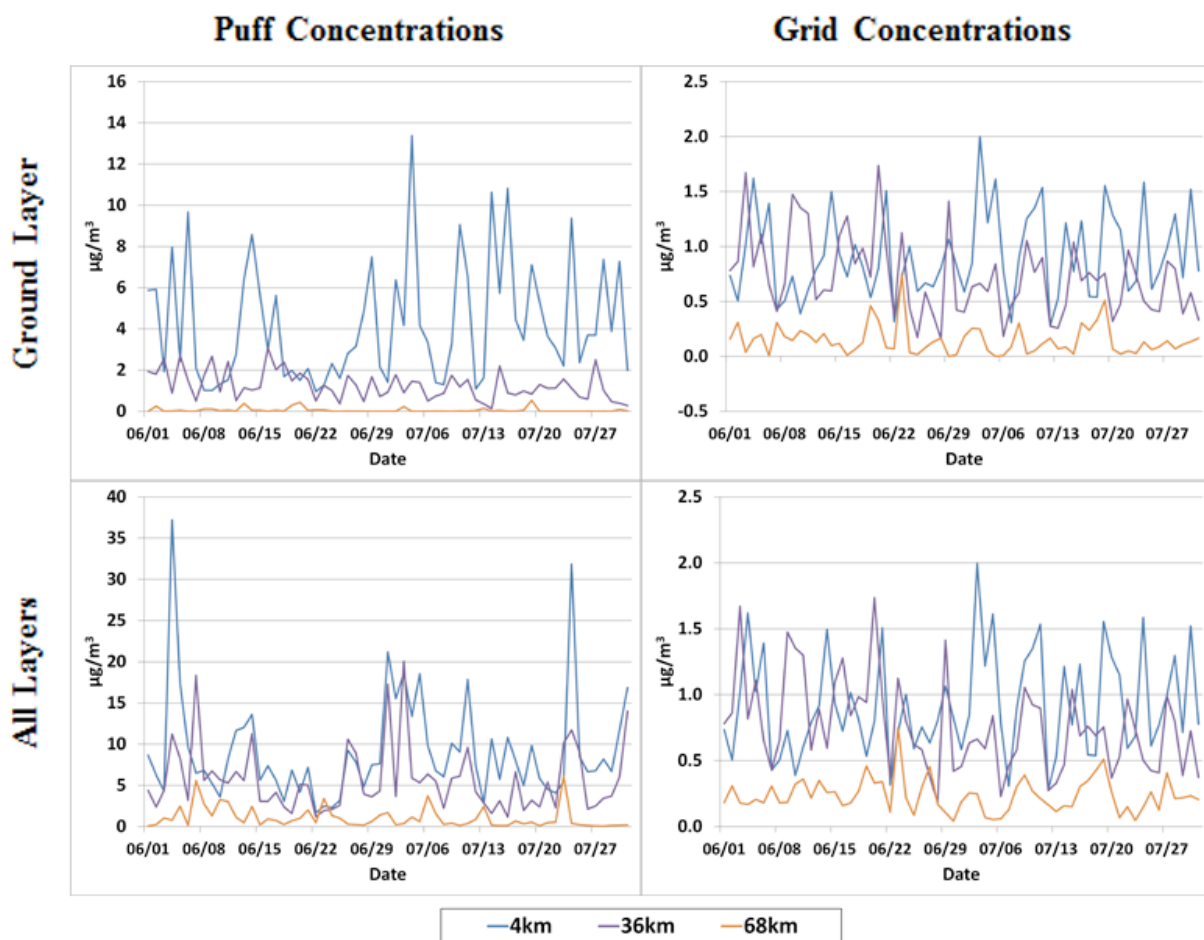

Figure S3: Daily variability in maximum  $PM_{2.5}$  concentrations in puffs and in airport contribution to grid cells at various distances in modeled surface layer, and in all layers. The analysis includes only those grid cells in the outer-most ring as we go outward from the airport, and thus no overlap of grid cells in each colored line. Note that the vertical axis scale varies by graph.

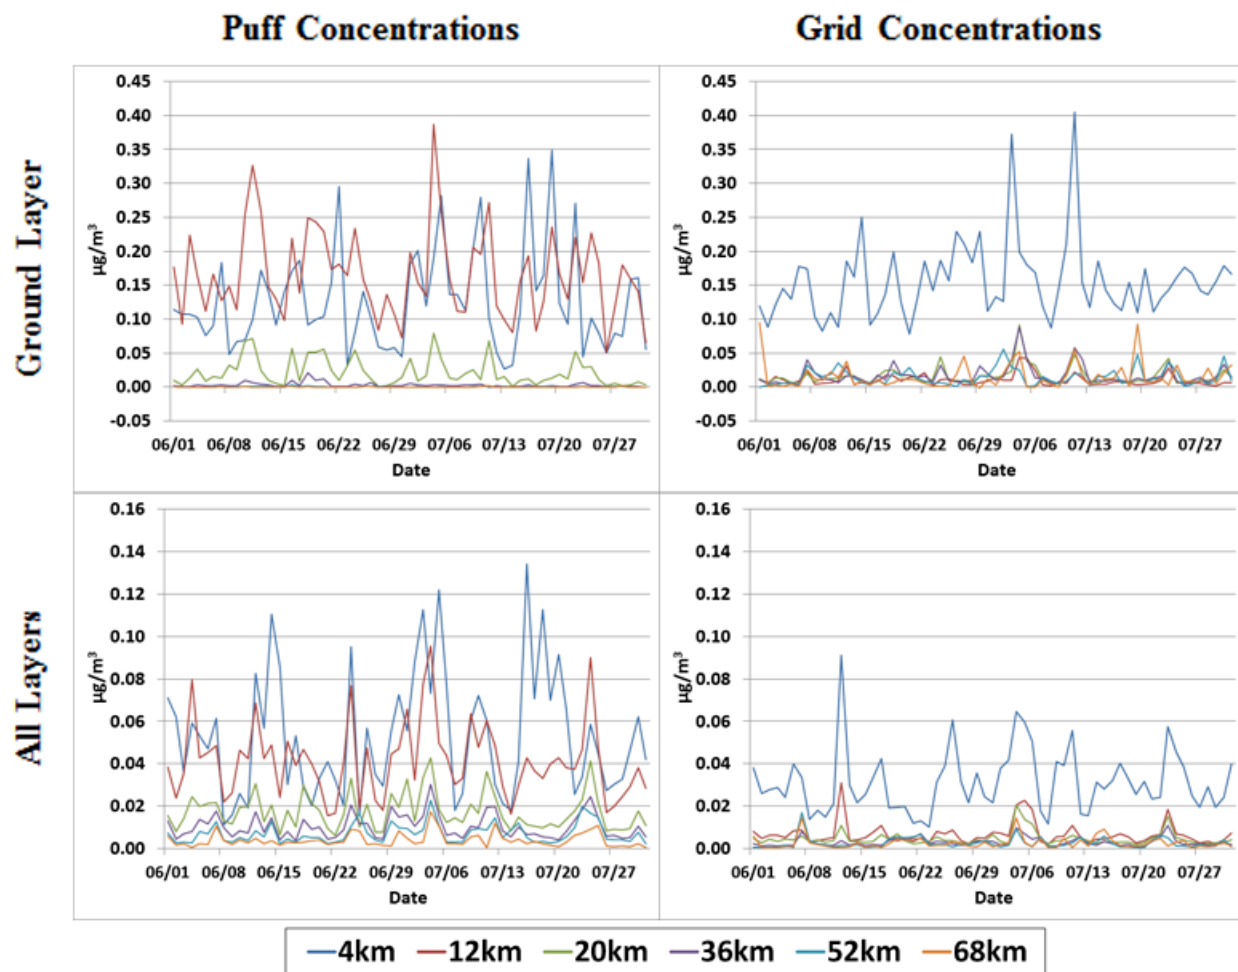

Figure S3a: Daily variability in median  $\text{PM}_{2.5}$  concentrations in puffs and in airport contribution to grid cells at various distances in modeled surface layer, and in all layers. The analysis includes only those grid cells in the outer-most ring as we go outward from the airport, and thus no overlap of grid cells in each colored line. Note that the vertical axis scale varies by graph.

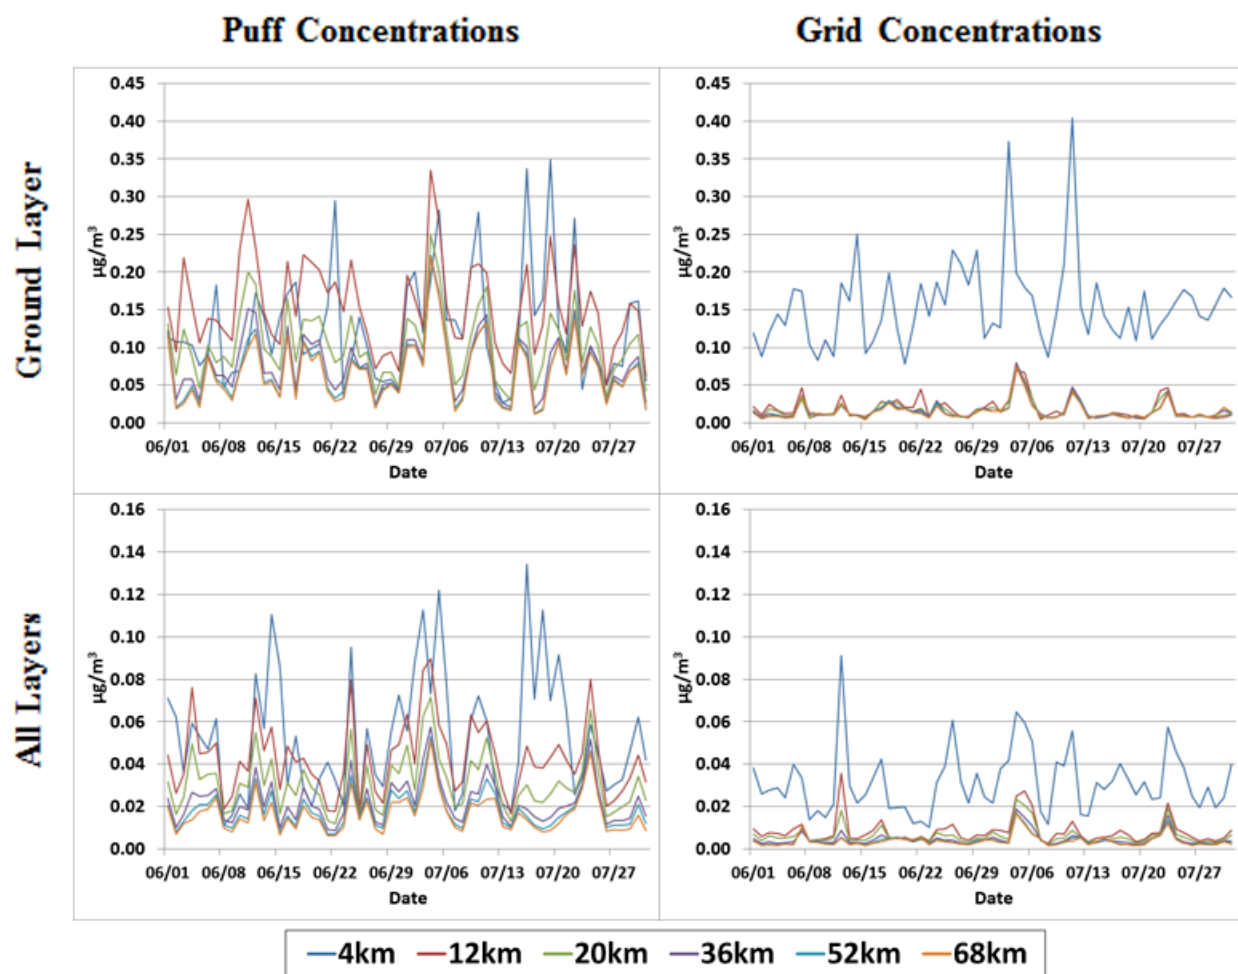

Figure S4: Daily variability in median  $PM_{2.5}$  concentrations in puffs and in airport contribution to grid cells at various distances in modeled surface layer, and in all layers. The analysis includes all grid cells in each concentric ring as we go outward from the airport, so puffs or grid cells in each colored line are also used to calculate the results at all greater distances from the airport. Note that the vertical axis scale varies by graph.

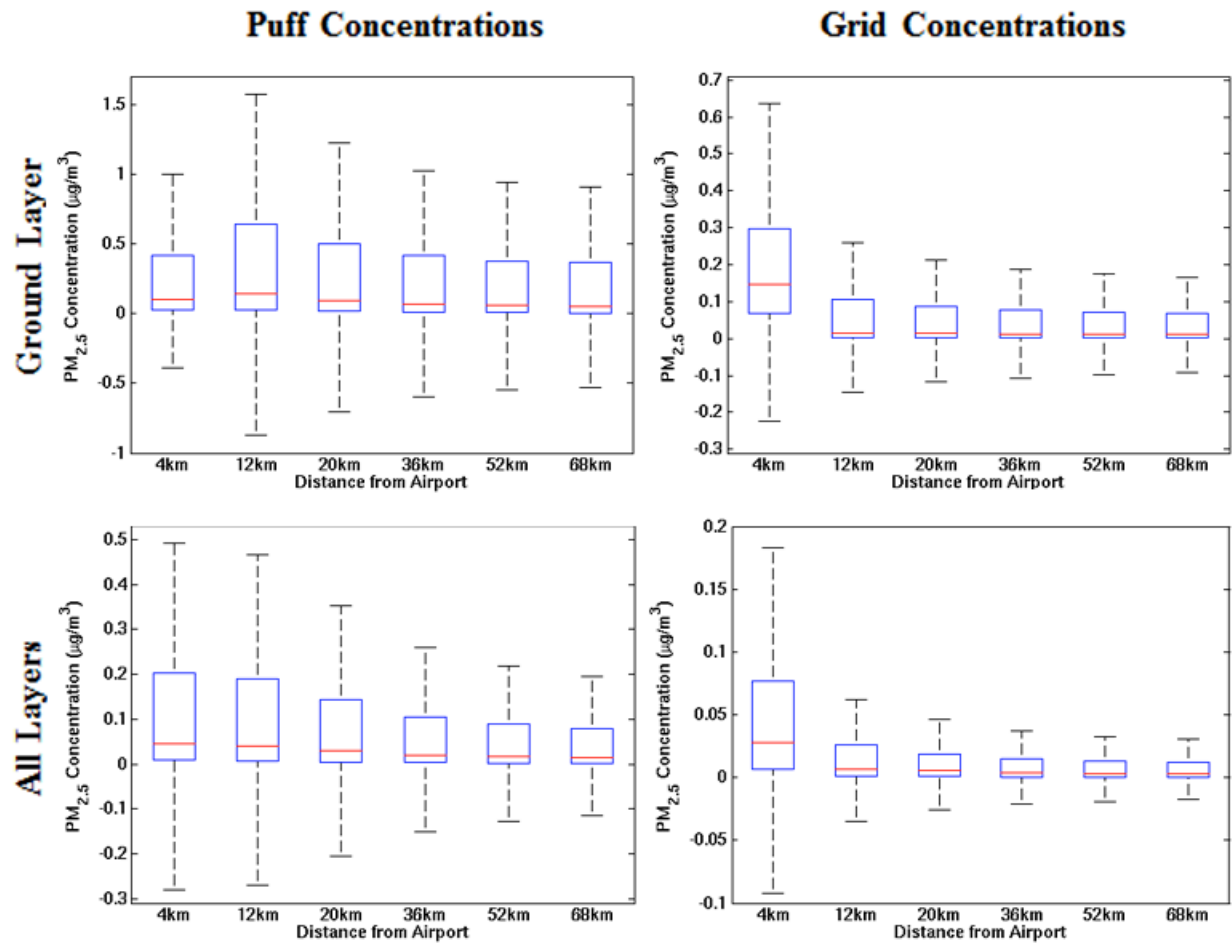

Figure S5: Box-and-whisker plots (excluding outliers) of  $PM_{2.5}$  concentrations in puffs and in aircraft contribution to grid cells at various distances in modeled surface layer, and in all layers. The analysis includes all grid cells in each concentric ring as we go outward from the airport, so puffs or grid cells in each box and whisker are also used to calculate the results at all greater distances from the airport. Note that the vertical axis scale varies by graph.

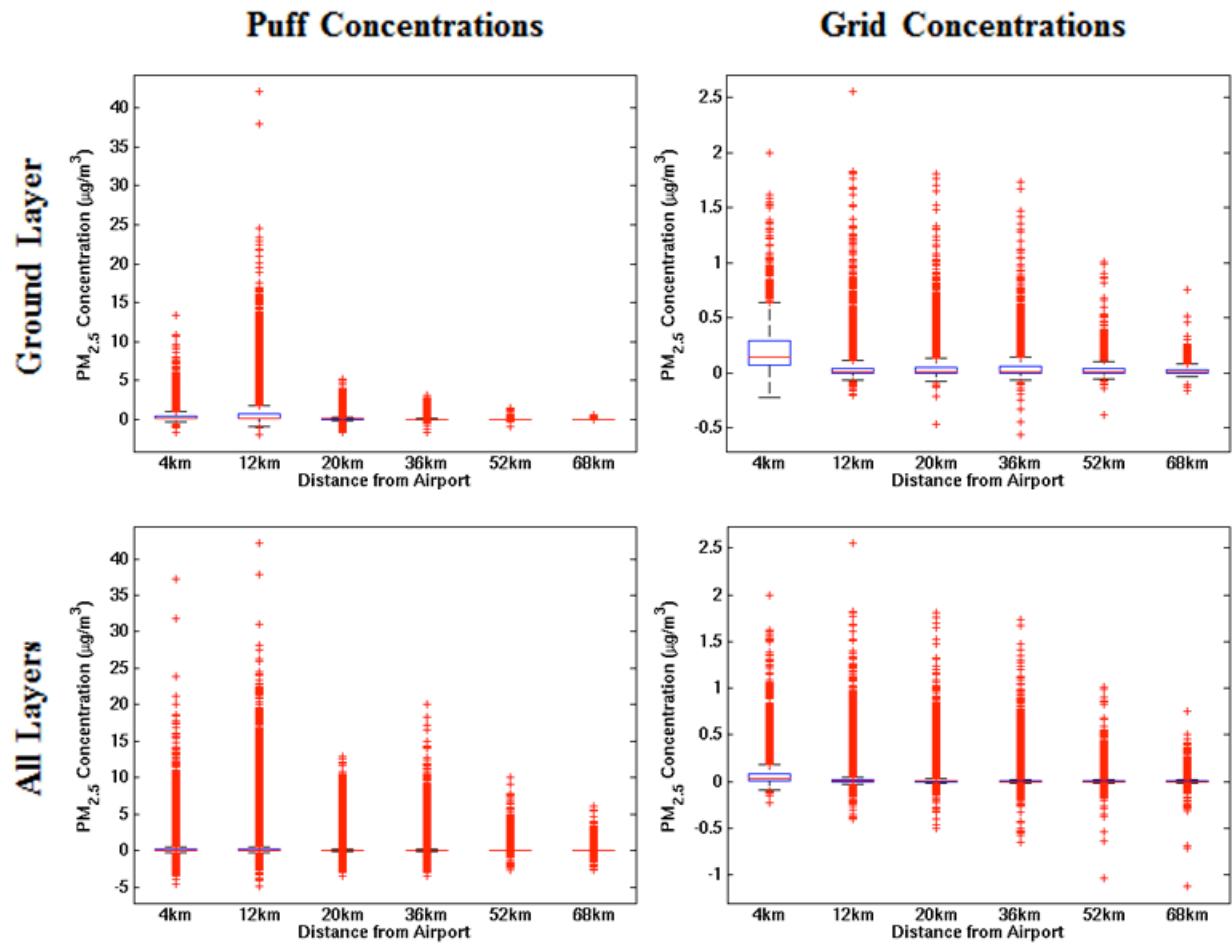

Figure S6: Box-and-whisker plots (including outliers) of PM<sub>2.5</sub> concentrations in puffs and in aircraft contribution to grid cells at various distances in modeled surface layer, and in all layers. The analysis includes only those grid cells in the outer-most ring as we go outward from the airport, and thus no overlap of grid cells in each bar. Note that the vertical axis scale varies by graph.



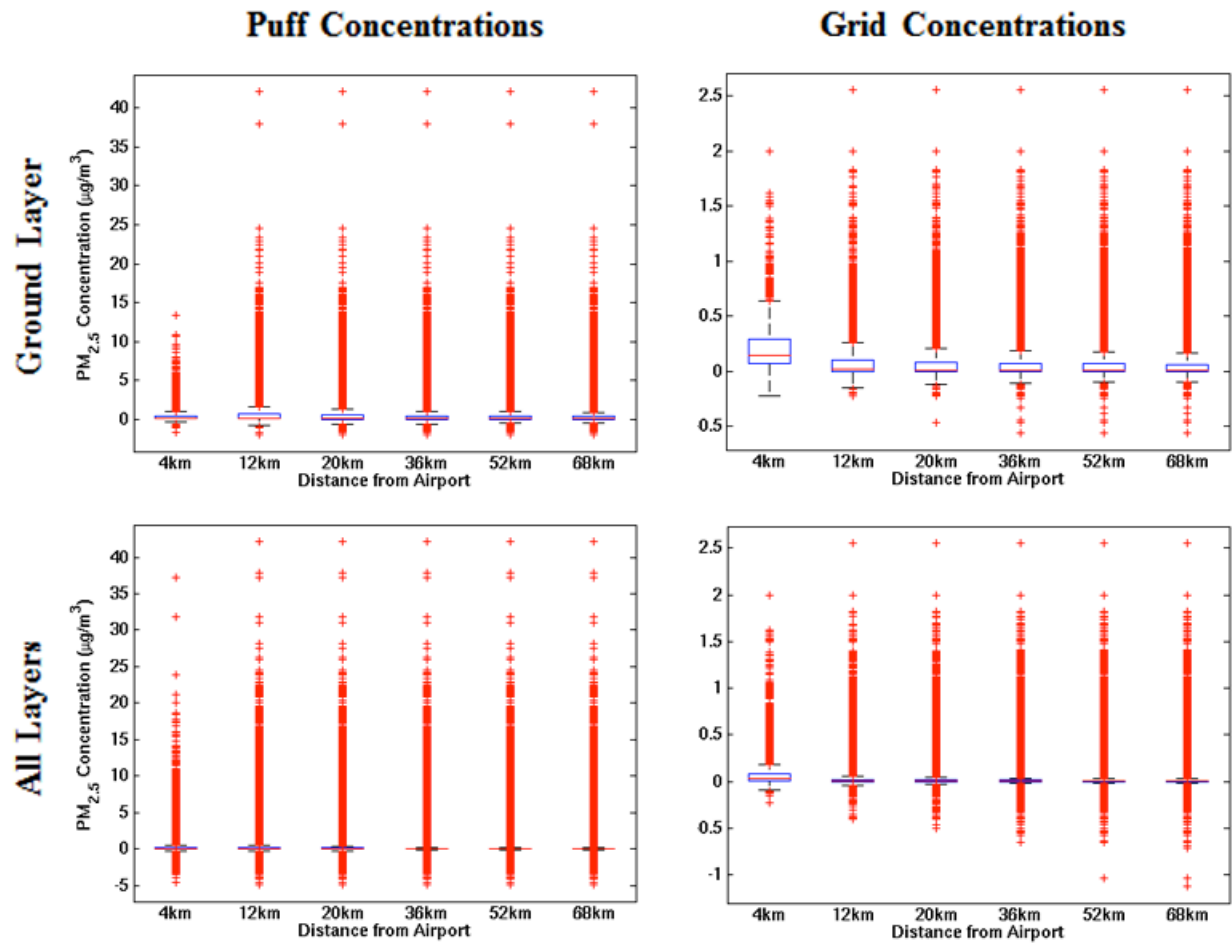

Figure S7: Box-and-whisker plots (including outliers) of PM<sub>2.5</sub> concentrations in puffs and in aircraft contribution to grid cells at various distances in modeled surface layer, and in all layers. The analysis includes all grid cells in each concentric ring as we go outward from the airport, so puffs or grid cells in each box and whisker are also used to calculate the results at all greater distances from the airport. Note that the vertical axis scale varies by graph.

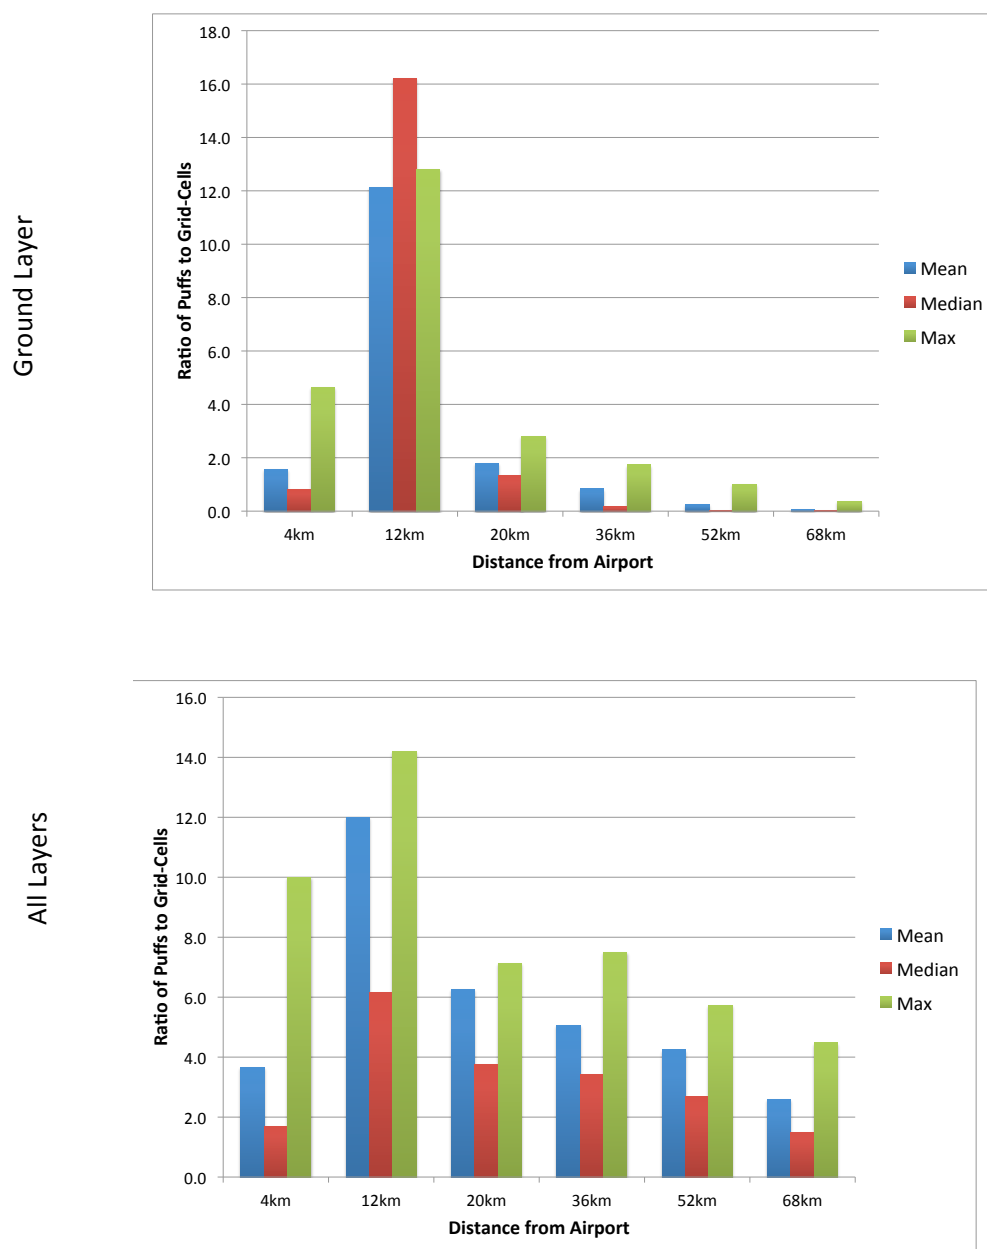

Figure S8: Puff-to-grid-cell ratios of mean, median and maximum daily PM<sub>2.5</sub> concentrations at various distances in modeled surface layer, and in all layers. The analysis includes only those grid cells in the outer-most ring as we go outward from the airport, and thus no overlap of grid cells in each bar.
